# Supplementary material
Source: Royal Society of Chemistry journal article supplement (doi:10.1039/d6ta02889f)
Supplement: d6ta02889f1.pdf [file d6ta02889f1.pdf]

## Multifunctional Soft Anti-Swelling Hydrogels-Based Sensor Reinforced with Carboxylated-MWCNTs and CMC for Human Motion Detection and Air-Underwater Communication

Ibrar Ahmad<sup>1</sup>, Azaz Ali Khan<sup>1</sup>, Zafran Ud Din, Daixin Ye<sup>2</sup>, Luqman Ali Shah<sup>1,2\*</sup>

<sup>1</sup>*Polymer Laboratory, National Centre of Excellence in Physical Chemistry, University of Peshawar, Peshawar 25120, Pakistan*

<sup>2</sup>*Institute for Sustainable Energy, College for Sciences, Shanghai University, Shanghai, 200444, China*

\*Corresponding author

**Email:** [luqman\\_alisha@uop.edu.pk](mailto:luqman_alisha@uop.edu.pk)

**Tel:** (9291)9216766

**Table S1** Comparative analysis of reported studies and the present work

| Materials          | Composition      | Gauge Factor | Swelling % | Conductivity S/m | Stretchability % | Ref           |
|--------------------|------------------|--------------|------------|------------------|------------------|---------------|
| A1H1M Hydrogel     | CNT-based sensor | 0.7          | 31         | 6.40             | 1134             | [1]           |
| PGCC Hydrogel      | F-CNT & CMC      | 5.06         | -          | 0.273            | 961              | [2]           |
| Cpam-cnt           | CNT & CMC        | 19           | -          | 31.9             | 637              | [3]           |
| PAAM-P(B2F1)       | CNT-PAAm         | 7.9          | 99         | 4.94             | 560              | [4]           |
| PSG-Zr-CNT         | CNT              | 2            | 30         | 0.42             | 623              | [5]           |
| PVA-CNT-S Hydrogel | PVA-CNT          | 1.7          | 0.8        | 0.11             | 200              | [6]           |
| Ni-LM@CNT          | CNTs             | 20           | -          | 0.5              | 400              | [7]           |
| ALT Hydrogel       | A-MWCNTs)        | 9.2          | -          | 1.85             | 500              | [8]           |
| G-CNTs hydrogel    | CNT              | 9.45         | -          | 0.142            | 1000             | [9]           |
| G3-Hydrogel        | COO-MWCNTs & CMC | 17           | 20         | 82               | 1254             | Current study |

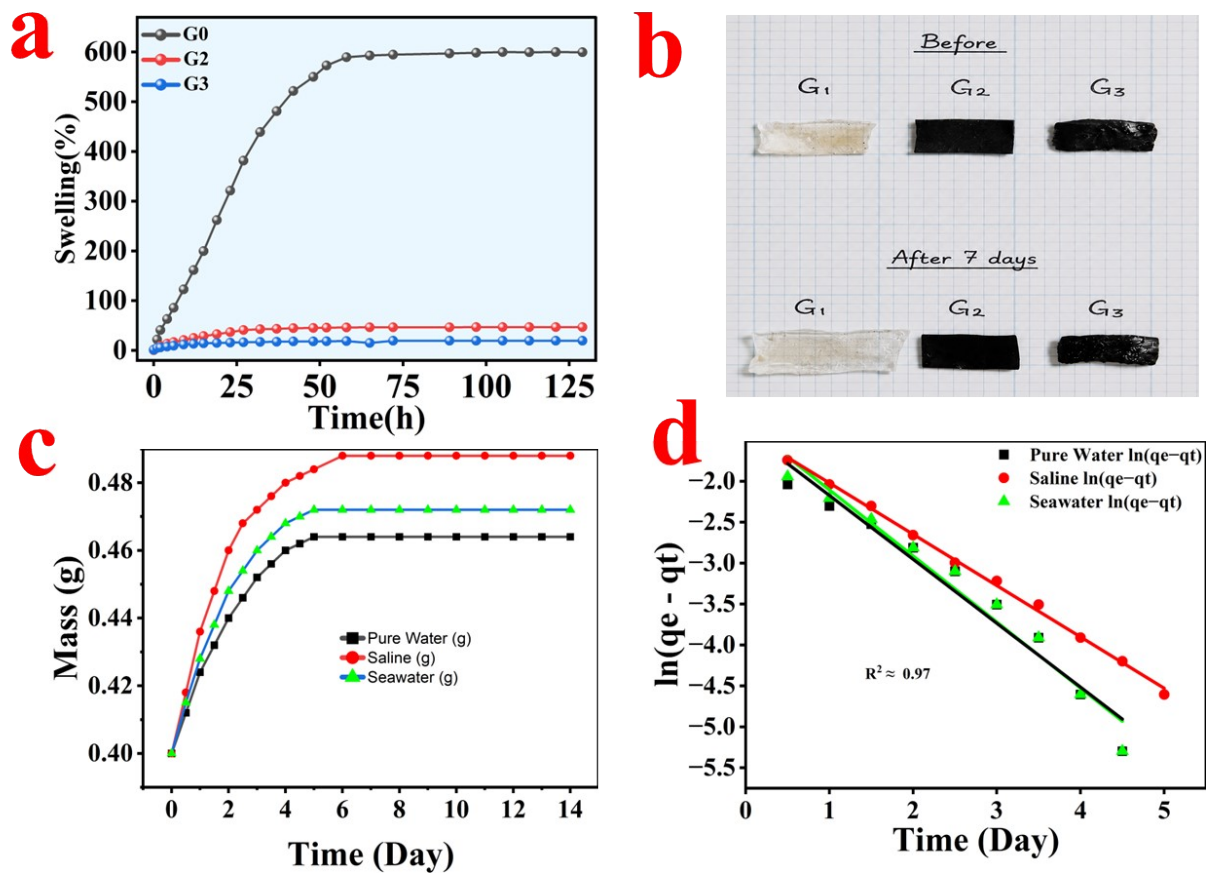

**Fig S1** (a) Swelling percentage of G1, G2, and G3 hydrogels. (b) Photographs of G1, G2, and G3 after 7 days of immersion. (c) Swelling behavior of G3 in pure water, saline, and seawater. (d) Pseudo-first-order kinetic fitting of G3 swelling in different media.



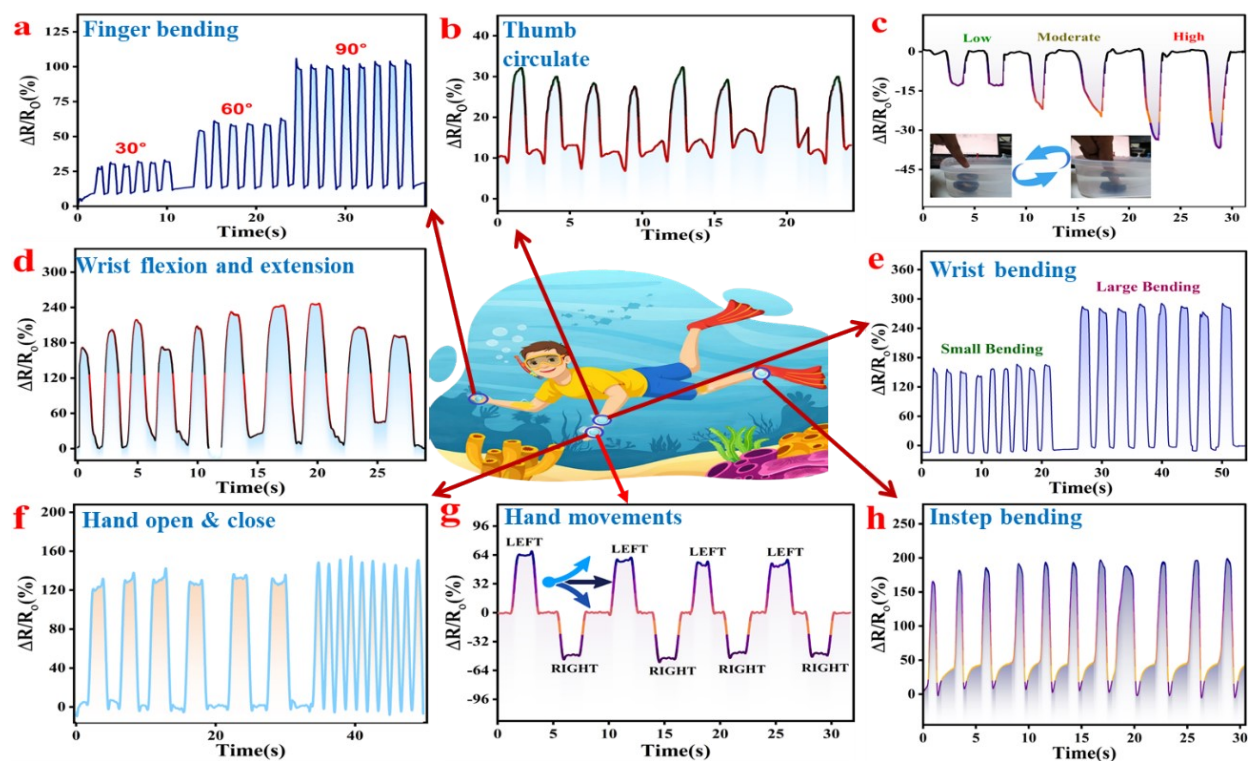

**Fig. S3** Demonstration of the hydrogel sensor operating in water for real-time tracking of body movements: (a) finger bending at three different angles, (b) circular movement of the thumb, (c) response to light and strong pressing, (d) wrist bending and straightening, (e) small and large wrist movements, (f) hand opening and closing, (g) side-to-side hand motion, (h) bending of the instep.

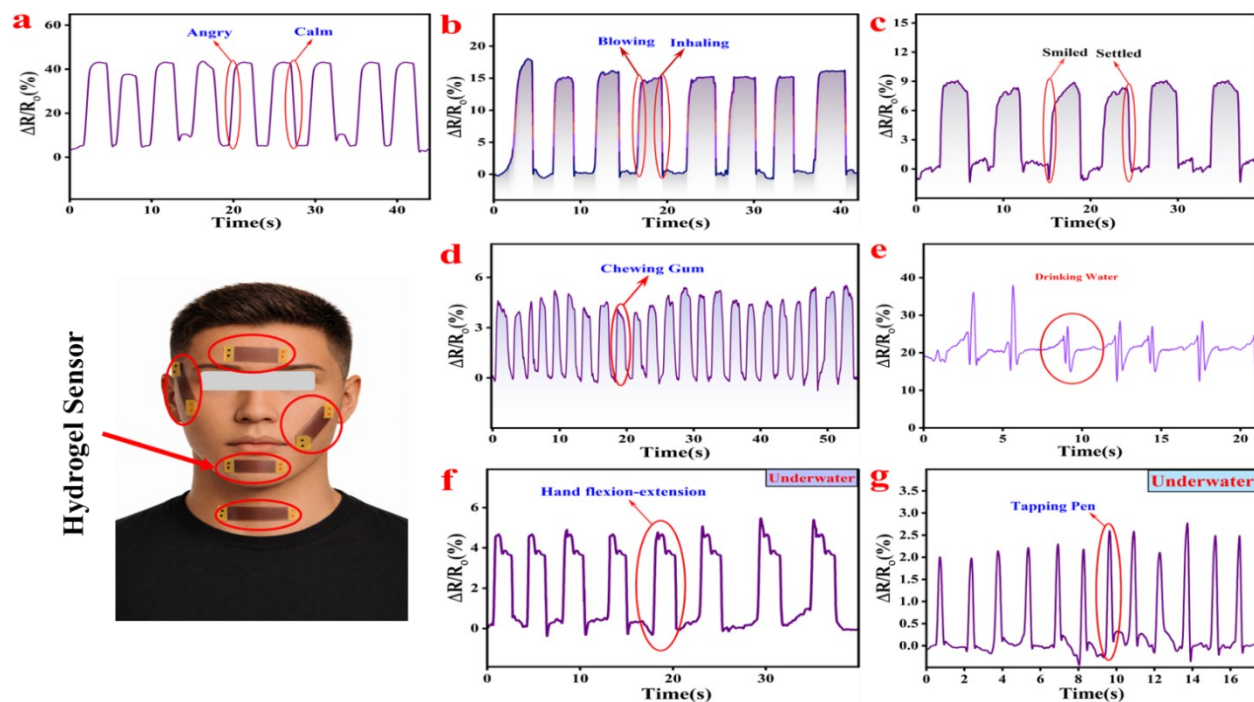

**Fig. S4** Detection of subtle human activities using the hydrogel sensor: (a) facial expression changes between angry and calm states, (b) breathing behavior during blowing and inhaling, (c) smile and settled facial expression, (d) chewing motion while chewing gum, (e) signal response during drinking water; and underwater physiological movements such as (f) muscle movement of hand flexion-extension and (g) pen tapping on hydrogel.

## References

1. Tian, R., et al., *Molecularly synergistic organogel with engineered conductivity and anti-swelling unity for reliable sleep apnea monitoring*. *Chemical Engineering Journal*, 2025: p. 170116.
2. Luo, X., et al., *Dual-network conductive hydrogels based on carboxymethylcellulose/aminated carbon nanotube reinforcement: Monitoring human micro-expressions and signal changes*. *International Journal of Biological Macromolecules*, 2025: p. 146012.

3. Ren, J., X. Yang, and X. Xiang, *Carboxymethyl cellulose-reinforced sandwich-structured carbon nanotube composite hydrogels for strain sensing and joule heating*. Carbohydrate Polymers, 2025: p. 124291.
4. Yuan, H., et al., *Hydrophobic and adhesive elastomer encapsulation for anti-drying, non-swelling, and adhesive hydrogels*. Advanced Functional Materials, 2024. **34**(51): p. 2409703.
5. Wang, L., et al., *Anti-swelling and highly sensitive hydrogel strain sensor for underwater communication and remote robotic operations*. Chemical Engineering Journal, 2026: p. 172534.
6. Li, S., et al., *Anisotropic tough and non-swelling hydrogels based on hofmeister-effect for underwater monitoring*. Advanced Functional Materials, 2026. **36**(24): p. e27007.
7. Chen, H., et al., *Hydrogel-based sandwich-structured triboelectric nanogenerator energy harvesting storage system for multi-functional sensing and monitoring*. Chemical Engineering Journal, 2025: p. 168739.
8. Khan, M., et al., *Hydrophobically associated functionalized CNT-reinforced double-network hydrogels as advanced flexible strain sensors*. ACS Applied Polymer Materials, 2022. **4**(10): p. 7397-7407.
9. UrRehman, T., et al., *Gum arabic-CNT reinforced hydrogels: dual-function materials for strain sensing and energy storage in next-generation supercapacitors*. Materials Advances, 2025. **6**(4): p. 1288-1299.
